# Supplementary material
Source: ML conference proceedings conference paper supplement (https://openreview.net/forum?id=A3ezGit0uB)
Supplement: supplementary_material [file polynomials.pdf › Pleiades-main/polynomials.pdf]

channels

$$\begin{bmatrix} -0.25 & 0.90 & 0.46 & 0.20 \\ -0.69 & -0.69 & -0.88 & 0.73 \\ 0.20 & 0.42 & -0.96 & 0.94 \end{bmatrix} \times$$

coefficients

discretized values

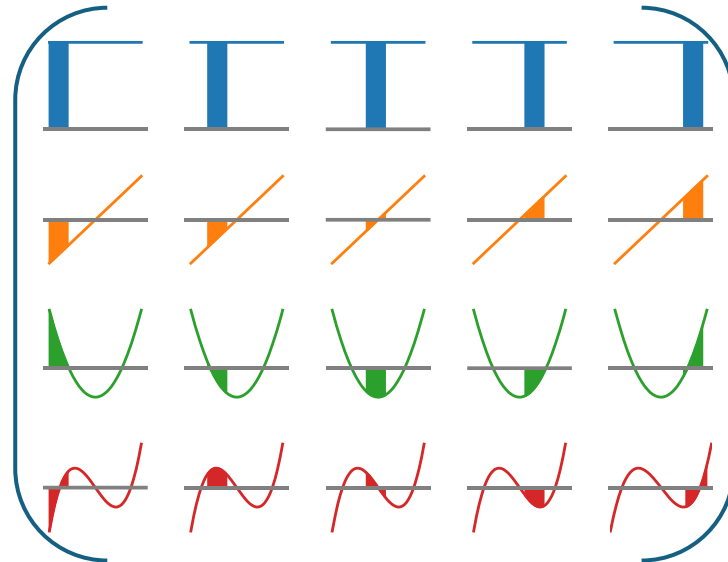

=

discretized values

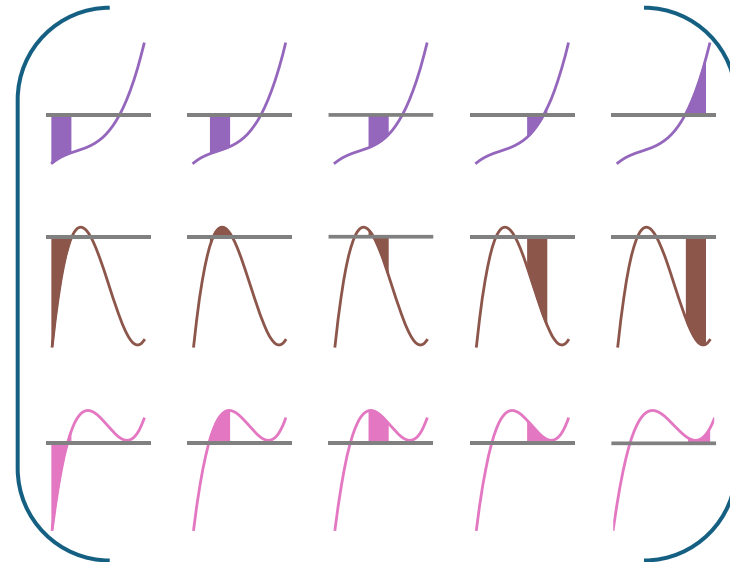

channels
